# Supplementary material
Source: PubMed Central journal article supplement (PMC3699956)
Supplement: Supp_Table1.pdf [file Supp_Table1.pdf]

## Supplementary Data

SUPPLEMENTARY TABLE S1. SEQUENCES OF PRIMERS USED IN REVERSE TRANSCRIPTION-POLYMERASE CHAIN REACTION

| <i>Gene</i>                     | <i>Primer sequence: sense/antisense</i>                           | <i>Product size (bp)</i> |
|---------------------------------|-------------------------------------------------------------------|--------------------------|
| <i>Col1</i>                     | 5' ATCCAGCTGACCTTCCTGCG 3'<br>5' TCGAAGCCGAATTCCTGGTCT 3'         | 322                      |
| <i>OCN</i>                      | 5' GAAGCCCAGCGGTGCA 3'<br>5' CACTACCTCGCTGCCCTCC 3'               | 100                      |
| <i>Runx2</i>                    | 5' CCACCCGGCCGAAGTGGTCC 3'<br>5' CCTCGTCCGCTCCGGCCCACA 3'         | 258                      |
| <i><math>\beta</math>-actin</i> | 5' TGGCACCACACCTTCTACAATGAGC 3'<br>5' GCACAGTTCTCCTTAATGTCACGC 3' | 396                      |
